# Supplementary material for: Relationship Between Serum Uric Acid, Nocturnal Hypertension and Risk for Preeclampsia in High-Risk Pregnancies.
Source: Research Square preprint supplement (doi:10.21203/rs.3.rs-4307958/v1), 2024-05-24
Supplement: Supplementary file 1 [file 952e2cdbb0f8acc54fcefb5a.docx]

**What is known about the topic?**

- In high-risk pregnant women, nocturnal hypertension is a strong predictor of preeclampsia (PE) and poor fetal outcomes.
- Also, high serum uric acid (SUA) is a well-known marker of PE.
- In non-pregnant women, high SUA and nocturnal hypertension are associated, although the mechanisms remain uncertain.

**What does this study add?**

- In high-risk pregnant women, there is a relationship between high SUA and PE
- Women who have both, high SUA and nocturnal hypertension, are at very high risk to develop PE in the next few weeks.
- Indee, high SUA doubles the risk of preeclampsia related to nocturnal hypertension alone.
- Conversely, women with both SUA < 4 mg/dL and nocturnal BP < 120/70 mmHg have a low risk of developing PE.
